# Supplementary material
Source: PubMed Central journal article supplement (PMC4256771)
Supplement: 4a3112ea78ca5298afc500d83975af7b_genetics.114.170084-7.pdf [file 4a3112ea78ca5298afc500d83975af7b_genetics.114.170084-7.pdf]

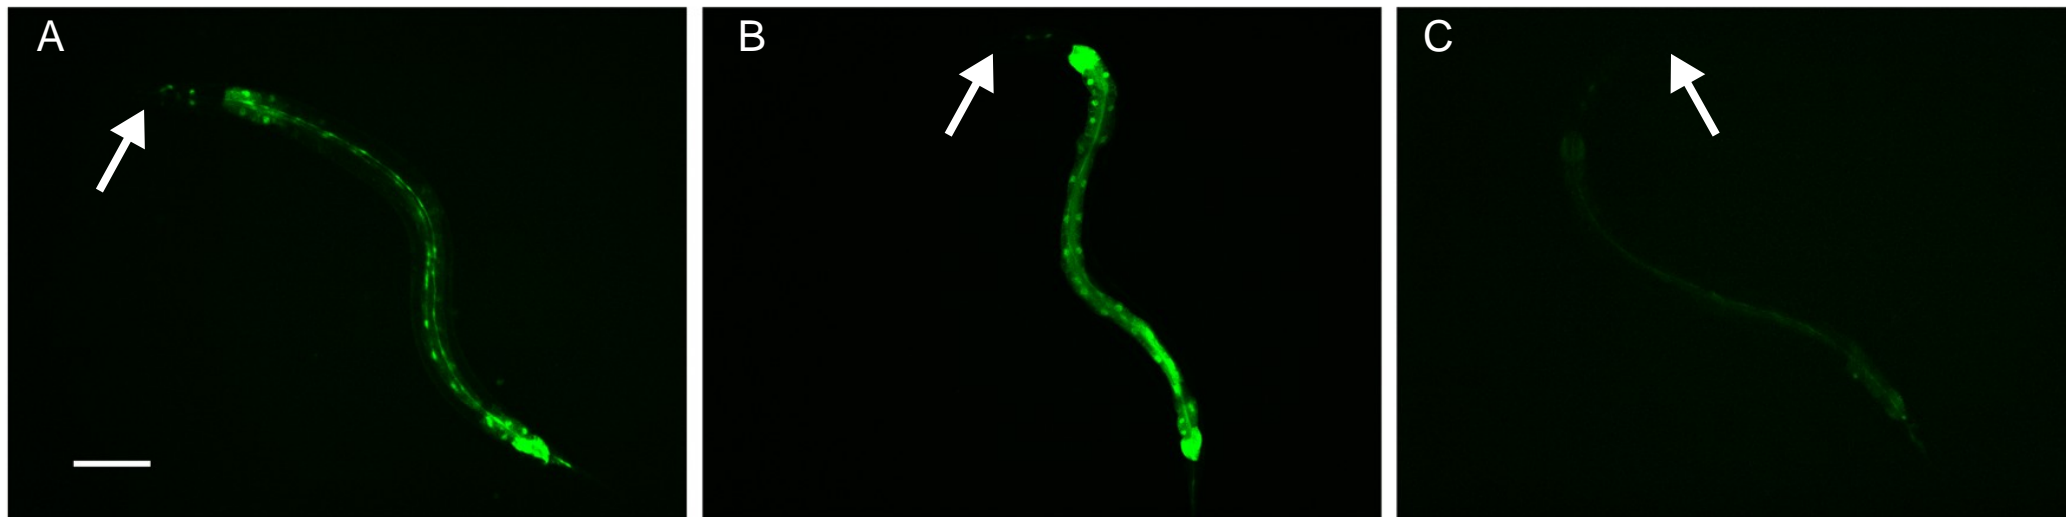

**Figure S5:** Interaction of *atf-6(ok551)* with the UPR pathway. (A) *hsp-4::gfp* expression in a wild-type background (same as figure 8A). (B) The expression of *hsp-4* is induced in a *atf-6(ok551)* mutant background, indicating that the ER is stressed. (C) *hsp-4::gfp* expression in animals treated with *xbp-1* RNAi is absent in a *atf-6(ok551)* mutant background. Arrows indicate the head of the animals. The scale bar represents 100  $\mu$ m. Animals shown are representative of the population.
