# Supplementary material
Source: PubMed Central journal article supplement (PMC4256771)
Supplement: 8e18761aef875291c2278d90d66d3933_genetics.114.170084-2.pdf [file 8e18761aef875291c2278d90d66d3933_genetics.114.170084-2.pdf]

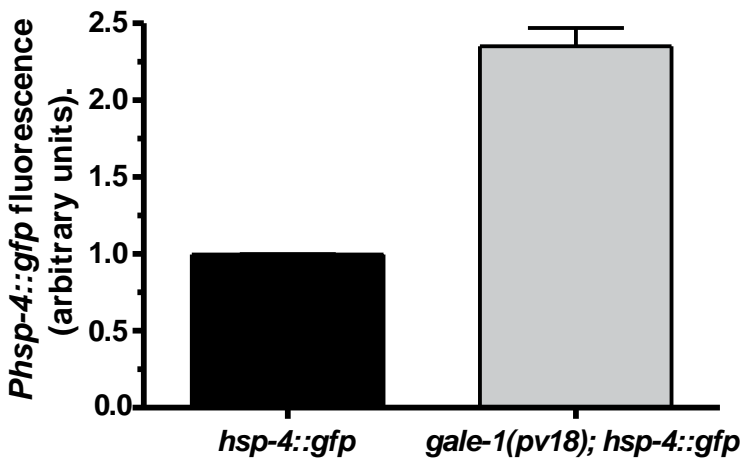

**Figure S4:** *hsp-4* expression in *gale-1(pv18)* mutant background. Quantification of the expression of *hsp-4* in a wild type and in *gale-1(pv18)* mutant. The fluorescence levels were relative to the mean of *hsp-4::gfp* in a wild type background. For quantification, we analysed  $1388 \times 1040$  pixel 16-bit greyscale images using ImageJ with the MacBiophotonics plugins. For each individual trial, exposure time was calibrated to avoid saturated pixels for the set of animals.  $N > 76$ .  $P > 0.005$
