# Supplementary material
Source: PubMed Central journal article supplement (PMC4256771)
Supplement: 402c627f5300a388adab103c372f3560_genetics.114.170084-3.pdf [file 402c627f5300a388adab103c372f3560_genetics.114.170084-3.pdf]

**Table S1:** Developmental delay of the *gale-1(pv18)* mutant: Wild type *C. elegans* develop from the first larval stage L1 to L4 and then to adult in 3 days either at 16°C or 20°C. However *gale-1(pv18)* needs up to 5 days to reach adulthood. \* Those strains are in a *fer-15(b26)* background, this mutation affects sperm production at 25°C but does not affect development. N>200.

| Strain                | Days   | 16°C              | 20°C              |
|-----------------------|--------|-------------------|-------------------|
| <i>Wild type</i> *    | 3 Days | 90±6% Young adult | 100% Adult        |
| <i>gale-1(pv18)</i> * | 3 Days | 100% L2 or L3     | 64±9% L1          |
|                       | 5 Days | 82±6% Young adult | 67±7% Young adult |
