# Supplementary material
Source: PubMed Central journal article supplement (PMC4256771)
Supplement: 709c86f990f097099d43283485cbf658_genetics.114.170084-6.pdf [file 709c86f990f097099d43283485cbf658_genetics.114.170084-6.pdf]

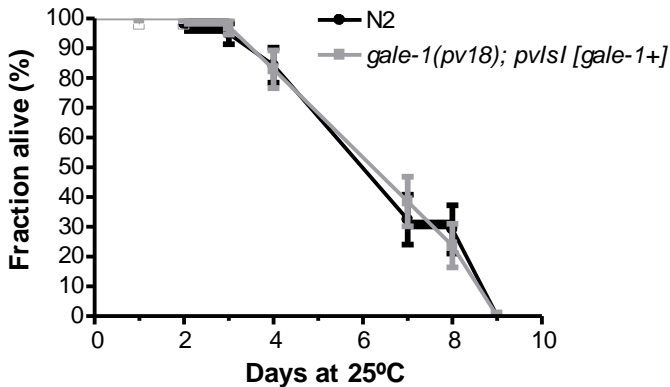

**Figure S6:** Survival of *gale-1(pv18)* carrying a construction of *gale-1+* in the presence of *Enterococcus faecalis*. No differences are observed with the wild-type strain ( $P>0.5$ ), indicating that the expression of the *gale-1+* rescues the hypersensitivity to infection.
