# Supplementary material
Source: PubMed Central journal article supplement (PMC4256771)
Supplement: 7326defa97c06a4339d52a41e47ff692_genetics.114.170084-5.pdf [file 7326defa97c06a4339d52a41e47ff692_genetics.114.170084-5.pdf]

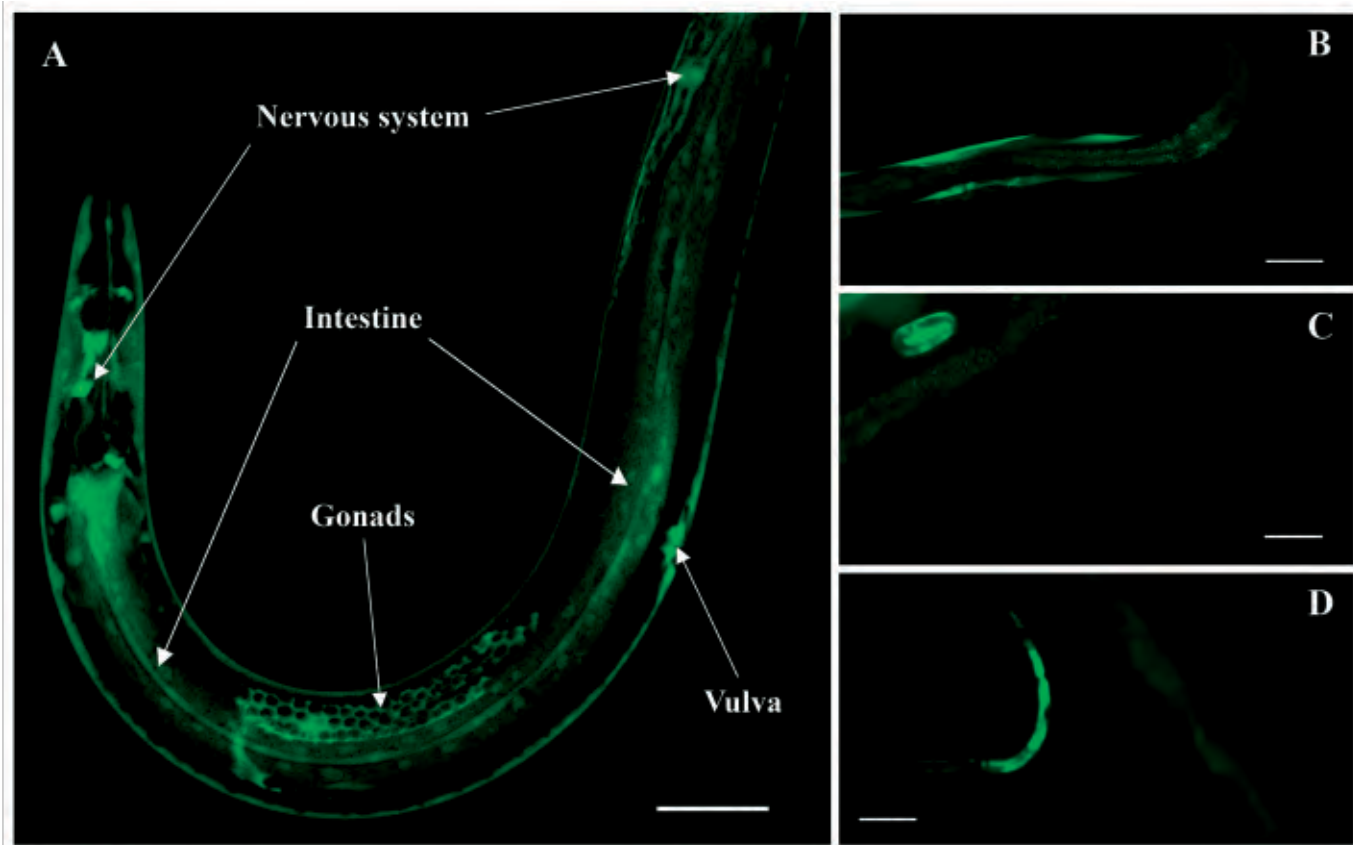

**Figure S2:** Expression of GFP under the *gale-1* promoter. (A) Expression is observed in gonads, vulva, intestine, hypodermis and nervous system. (B) As also in muscle cells. This late tissue is relevant because is where MIG-17 is produced and secreted to reach gonad basement membrane. (C) The expression is higher in embryos and (D) L1 stage. Images for figure A were captured using a TCS SP2 confocal microscope equipped with an HCX PL APO 40x/1.25 objective lens. Images were taken using integrated Leica software and processed with ImageJ and Adobe Photoshop. Figures B, C and D were acquired as described in material and methods for SJ4005 and GM266 strains.
