# Supplementary material
Source: PubMed Central journal article supplement (PMC4256771)
Supplement: b974dda952f14601629f226f0574abe7_genetics.114.170084-4.pdf [file b974dda952f14601629f226f0574abe7_genetics.114.170084-4.pdf]

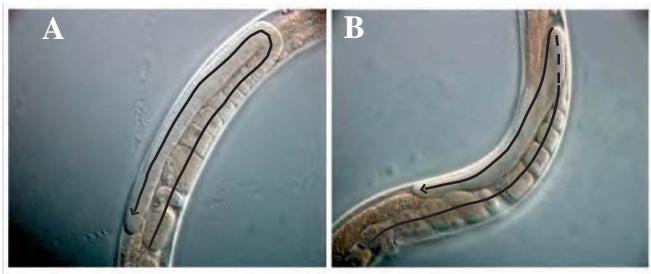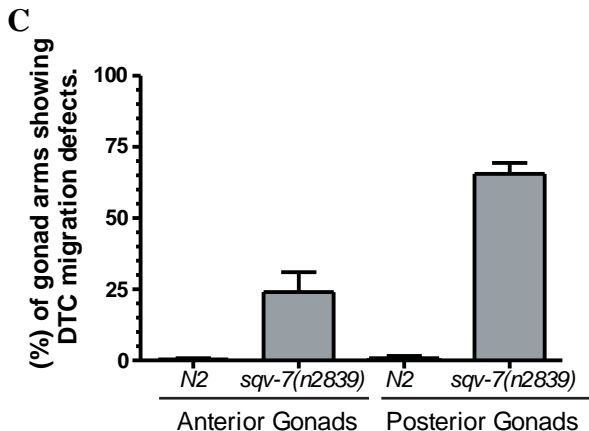

**Figure S3:** *sqv-7(n2839)* has gonad migration defects: (A) Gonad of a wild type animal. (B) Gonad of a *sqv-7(n2839)* mutant. The gonad in this mutant does not have the characteristic U-shape, similarly to the *gale-1(pv18)* mutant. (C) Percentage of anterior and posterior gonads affected. N>20. P < 0.05
